# Supplementary material
Source: HighWire-hosted journal article supplement (https://cmaj.ca/highwire/filestream/149707/field_highwire_adjunct_files/3/230492-res-4-at.pdf)
Supplement: 230492-res-4-at.pdf [file 230492-res-4-at.pdf]

**Appendix 4a.** Matched baseline characteristics for VUC prompt referrals who presented to ED within 72hrs versus matched in-person controls.

|                                                                        | Referred to ED by<br>VUC<br>N=2,129 | In-Person ED<br>N=2,129 | Std Diff* |
|------------------------------------------------------------------------|-------------------------------------|-------------------------|-----------|
| Mean (SD) age                                                          | 29.1 (24.9)                         | 28.2 (22.1)             | 0.04      |
| <18 years                                                              | 876 (41.2%)                         | 781 (36.7%)             | 0.09      |
| 18-64 years                                                            | 1,031 (48.4%)                       | 1,175 (55.2%)           | 0.14      |
| ≥ 65 years                                                             | 222 (10.4%)                         | 173 (8.1%)              | 0.08      |
| Female                                                                 | 1,296 (60.9%)                       | 1,322 (62.1%)           | 0.03      |
| Urban                                                                  | 2,052 (96.4%)                       | 2,043 (96.0%)           | 0.02      |
| Neighbourhood income quintiles 4-5                                     | 976 (45.8%)                         | 958 (45.0%)             | 0.02      |
| ONMARG ethnic diversity quintiles 4-5                                  | 1,163 (54.6%)                       | 1,126 (52.9%)           | 0.03      |
| ONMARG residential instability quintiles 4-5                           | 979 (46.0%)                         | 1,006 (47.2%)           | 0.03      |
| ONMARG material deprivation quintiles 4-5                              | 609 (28.6%)                         | 630 (29.6%)             | 0.02      |
| ONMARG dependency quintiles 4-5                                        | 573 (26.9%)                         | 583 (27.4%)             | 0.01      |
| Asthma                                                                 | 424 (19.9%)                         | 397 (18.6%)             | 0.03      |
| Congestive heart failure                                               | 60 (2.8%)                           | 48 (2.2%)               | 0.04      |
| Hypertension                                                           | 346 (16.2%)                         | 287 (13.5%)             | 0.08      |
| Chronic obstructive pulmonary disease                                  | 39 (1.8%)                           | 44 (2.1%)               | 0.02      |
| Diabetes                                                               | 175 (8.2%)                          | 167 (7.8%)              | 0.01      |
| Dementia                                                               | 30 (1.4%)                           | 23 (1.1%)               | 0.03      |
| Johns Hopkins ADGs 0-4                                                 | 687 (32.3%)                         | 673 (31.6%)             | 0.01      |
| Johns Hopkins ADGs 5-9                                                 | 925 (43.4%)                         | 977 (45.9%)             | 0.05      |
| Johns Hopkins ADGs 10-14                                               | 407 (19.1%)                         | 383 (18.0%)             | 0.03      |
| Johns Hopkins ADGs 15+                                                 | 110 (5.2%)                          | 96 (4.5%)               | 0.03      |
| Rostered to a primary care physician                                   | 2,050 (96.3%)                       | 2,021 (94.9%)           | 0.07      |
| Mean (SD) physician (PCP and specialists) visits in preceding 365 days | 9.8 (13.4)                          | 9.0 (11.6)              | 0.07      |
| Mean (SD) ED visits in preceding 365 days                              | 1.0 (3.0)                           | 0.9 (1.7)               | 0.05      |
| Mean (SD) hospitalizations in preceding 365 days                       | 0.2 (0.7)                           | 0.2 (0.8)               | 0.00      |

\*Std Diff greater than 0.1 are generally considered meaningful

Where: SD = standard deviation; VUC = virtual urgent care; ED = emergency department; Std Diff = standardized difference; ONMARG = Ontario Marginalization Index; ADGs = aggregated diagnosis groupings; PCP = primary care provider.

**Appendix 4b.** Matched baseline characteristics for patients seen by a VUC provider with no ED referral plus matched in-person ED controls who were discharged from the ED.

|                                                                        | Seen by VUC<br>N=14,179 | In-Person ED<br>N=14,179 | Std Diff* |
|------------------------------------------------------------------------|-------------------------|--------------------------|-----------|
| Mean (SD) age                                                          | 28.1 (23.5)             | 27.6 (22.5)              | 0.02      |
| <18 years                                                              | 5,640 (39.8%)           | 5,485 (38.7%)            | 0.02      |
| 18-64 years                                                            | 7,386 (52.1%)           | 7,633 (53.8%)            | 0.03      |
| ≥ 65 years                                                             | 1,153 (8.1%)            | 1,061 (7.5%)             | 0.02      |
| Female                                                                 | 8,482 (59.8%)           | 8,704 (61.4%)            | 0.03      |
| Urban                                                                  | 13,533 (95.4%)          | 13,330 (94.0%)           | 0.06      |
| Neighbourhood income quintiles 4-5                                     | 6,210 (43.8%)           | 6,202 (43.7%)            | 0.00      |
| ONMARG ethnic diversity quintiles 4-5                                  | 7,069 (49.9%)           | 6,458 (45.6%)            | 0.09      |
| ONMARG residential instability quintiles 4-5                           | 5,803 (40.9%)           | 5,754 (40.6%)            | 0.01      |
| ONMARG material deprivation quintiles 4-5                              | 4,701 (33.1%)           | 4,696 (33.1%)            | 0.00      |
| ONMARG dependency quintiles 4-5                                        | 4,006 (28.2%)           | 4,331 (30.6%)            | 0.05      |
| Asthma                                                                 | 2,778 (19.6%)           | 2,684 (18.9%)            | 0.02      |
| Congestive heart failure                                               | 232 (1.6%)              | 252 (1.8%)               | 0.01      |
| Hypertension                                                           | 1,939 (13.7%)           | 1,801 (12.7%)            | 0.03      |
| Chronic obstructive pulmonary disease                                  | 223 (1.6%)              | 247 (1.7%)               | 0.01      |
| Diabetes                                                               | 1,051 (7.4%)            | 1,161 (8.2%)             | 0.03      |
| Dementia                                                               | 133 (0.9%)              | 83 (0.6%)                | 0.04      |
| Johns Hopkins ADGs 0-4                                                 | 4,777 (33.7%)           | 4,527 (31.9%)            | 0.04      |
| Johns Hopkins ADGs 5-9                                                 | 6,427 (45.3%)           | 6,617 (46.7%)            | 0.03      |
| Johns Hopkins ADGs 10-14                                               | 2,460 (17.3%)           | 2,468 (17.4%)            | 0.00      |
| Johns Hopkins ADGs 15+                                                 | 515 (3.6%)              | 567 (4.0%)               | 0.02      |
| Rostered to a primary care physician                                   | 13,745 (96.9%)          | 13,708 (96.7%)           | 0.01      |
| Mean (SD) physician (PCP and specialists) visits in preceding 365 days | 8.5 (10.8)              | 8.4 (11.2)               | 0.01      |
| Mean (SD) ED visits in preceding 365 days                              | 0.9 (2.3)               | 1.0 (1.7)                | 0.03      |
| Mean (SD) hospitalizations in preceding 365 days                       | 0.2 (0.7)               | 0.2 (0.7)                | 0.03      |

\*Std Diff greater than 0.1 are generally considered meaningful

Where: SD = standard deviation; VUC = virtual urgent care; ED = emergency department; Std Diff = standardized difference; ONMARG = Ontario Marginalization Index; ADGs = aggregated diagnosis groupings; PCP = primary care provider.
